# Supplementary material for: Residential proximity to metal emitting industries and toenail metal concentration in the US Gulf States
Source: Research Square preprint supplement (doi:10.21203/rs.3.rs-3210942/v1), 2023-08-07
Supplement: Supplementary file 1 [file d040152071b0f12629a2f91d.docx]

**Supplemental Material**

Industrial determinants of metal exposure among Gulf Coast residents

Joyce J.Y. Lin1*, Emily Werder2, Kaitlyn G. Lawrence2, W. Braxton Jackson II3, Dale P. Sandler2, Aisha S. Dickerson4, Lawrence S. Engel2,5, Ana M. Rule1

1Department of Environmental Health and Engineering, Johns Hopkins Bloomberg School of Public Health, Baltimore, MD, USA.

2Epidemiology Branch, National Institute of Environmental Health Sciences, National Institutes of Health, Research Triangle Park, NC, USA

3Social & Scientific Systems, Inc., Durham, NC, USA.

4Department of Epidemiology, Johns Hopkins Bloomberg School of Public Health, Baltimore, MD, USA.

5Department of Epidemiology, University of North Carolina Gillings School of Global Public Health, Chapel Hill, NC, USA.

**Contents**

**Supplemental Figure 1**. Distance from nearest NEI site by race and income category

**Supplemental Figure 2**. Stratified analysis by race

**Supplemental Figure 3**. Difference in blood elemental concentrations comparing Black participants to White participants in the GuLF BTEX sub-study

**Supplemental Figure 4.** Comparisons of blood elemental concentrations from GuLF BTEX sub-study to NHANES by race

**Supplemental Figure 5.** Toenail elemental concentrations by income category

**Supplemental Figure 6**. Racial differences in neighborhood poverty by state and income category

**Supplemental Table 1.** Covariates associated with toenail Pb and Hg concentrations


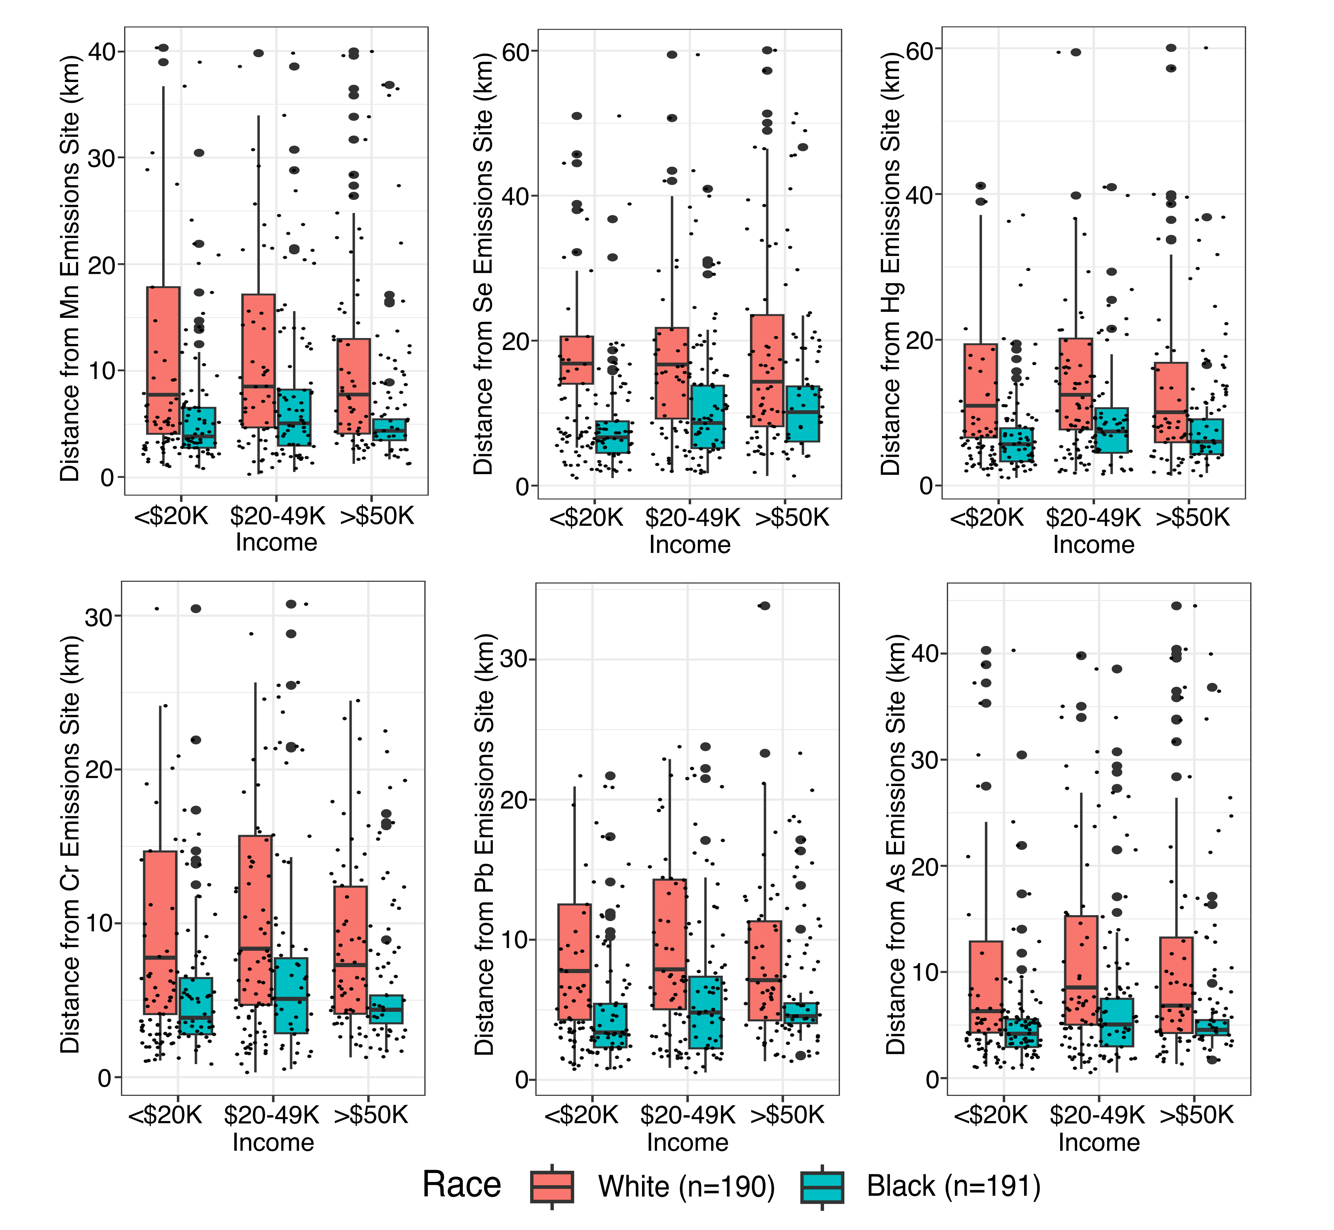


**Supplemental Figure 1**. Distance from nearest NEI site by race and income category


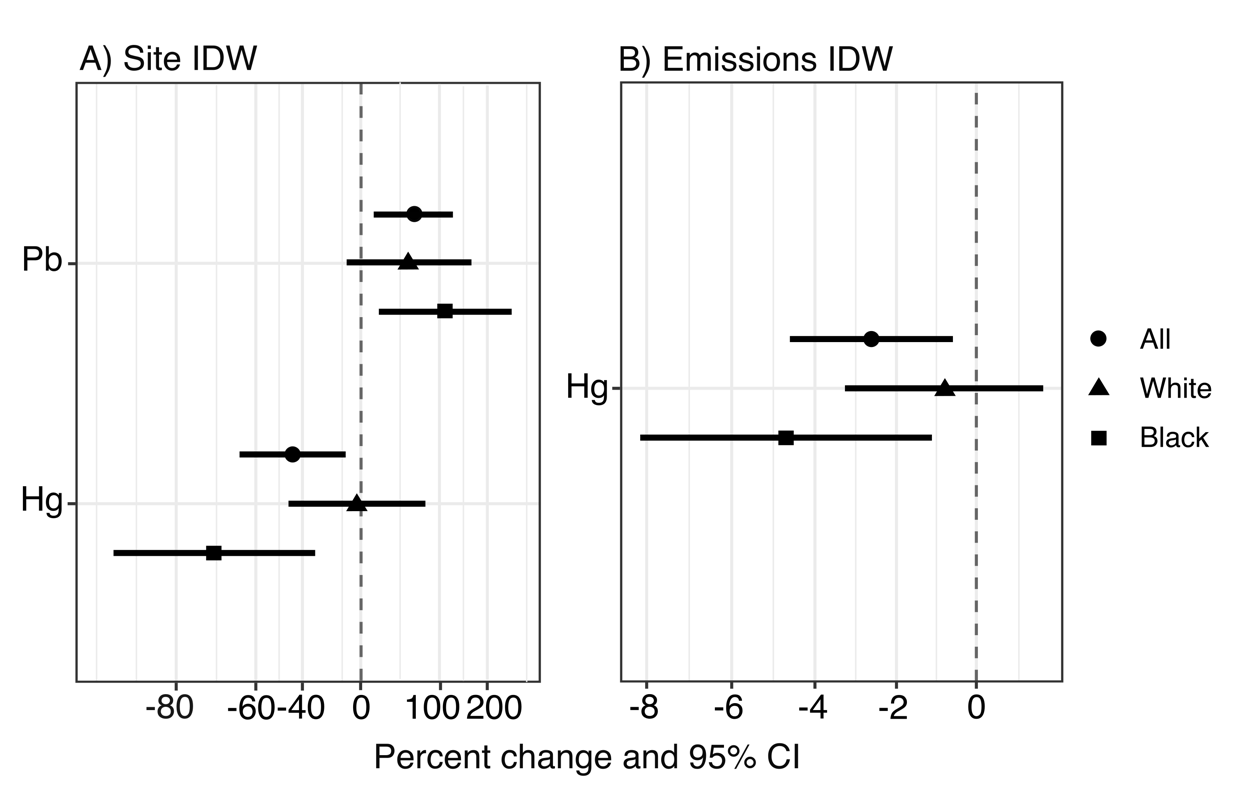


**Supplemental Figure 2**. Stratified analysis by race


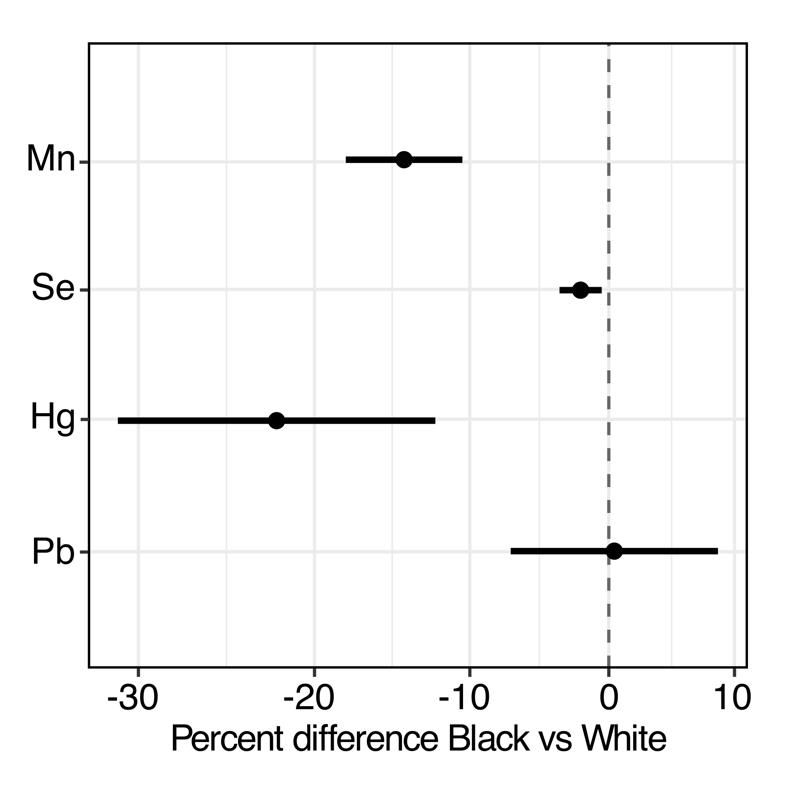


**Supplemental Figure 3**. Difference in blood elemental concentrations comparing Black participants to White participants in the GuLF BTEX sub-study (n = 723)


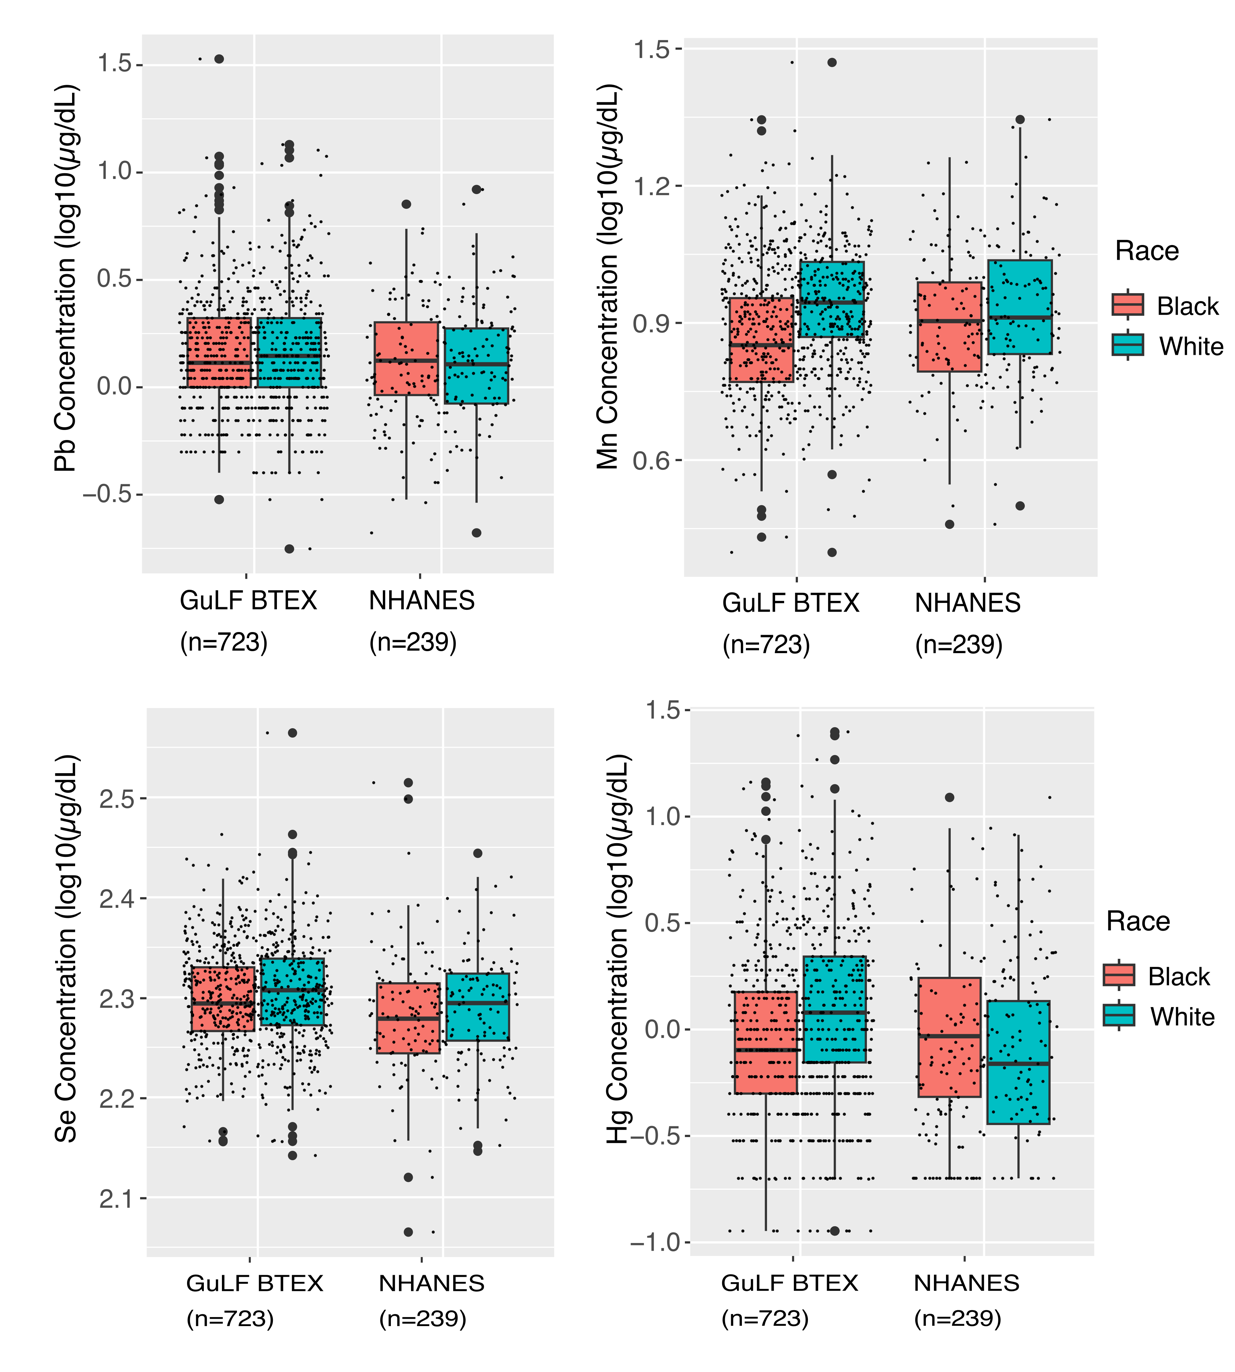
**Supplemental Figure 4.** Comparisons of blood elemental concentrations from GuLF BTEX sub-study to NHANES by race


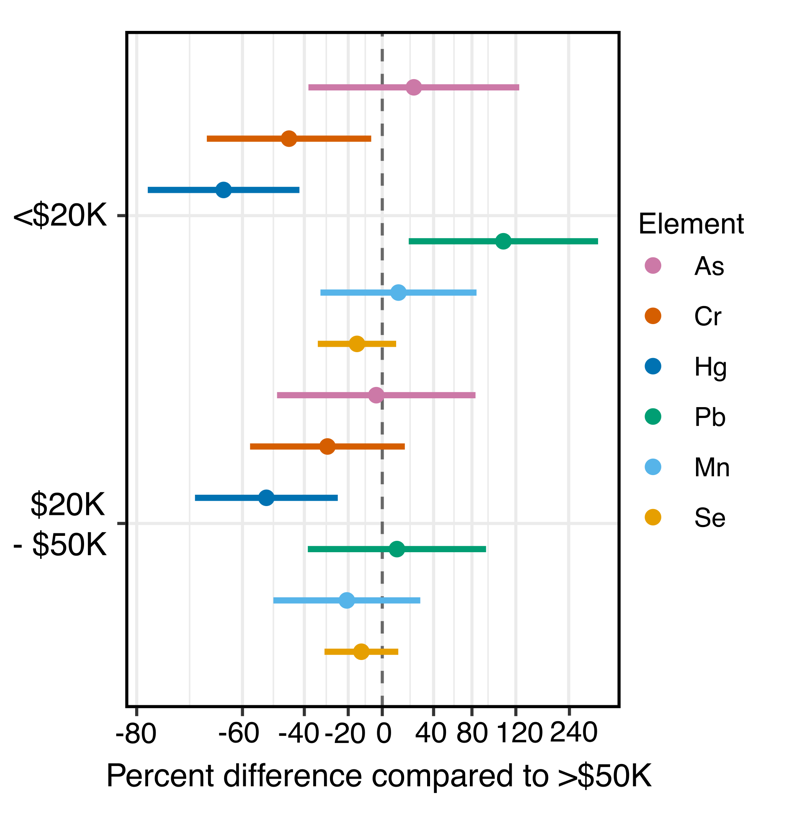


**Supplemental Figure 5.** Toenail elemental concentrations by income category


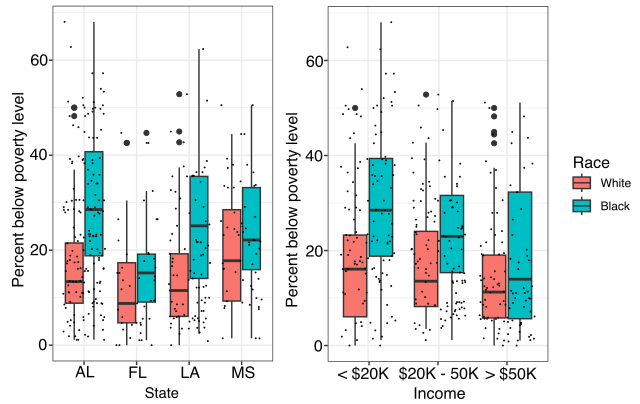


**Supplemental Figure 6**. Racial differences in neighborhood poverty by state and income category

**Supplemental Table 1.** Covariates associated with toenail Pb and Hg concentrations

|  | **Pb** | **Hg** |
| --- | --- | --- |
|  | Beta Coefficient (p-value) | Beta Coefficient (p-value) |
| Age |  | 0.0090 (0.0052) |
| Race |  | -0.40 (5.5e-7) |
| Education (years) | -0.03 (0.017) | 0.032 (0.015) |
| Passive smoke exposure |  | -0.21 (0.029) |
| Percent below poverty level* | 0.0093 (0.0049) | -0.0080 (0.0031) |
| Median year structures built* | -0.0096 (0.0017) | 0.011 (7.74e-6) |

* Census block group level, included in separate models
